# Supplementary material
Source: PubMed Central journal article supplement (PMC3896170)
Supplement: 1320886110_pnas.201320886SI.pdf [file 1320886110_pnas.201320886SI.pdf]

# Supporting Information

Lukens et al. 10.1073/pnas.1320886110

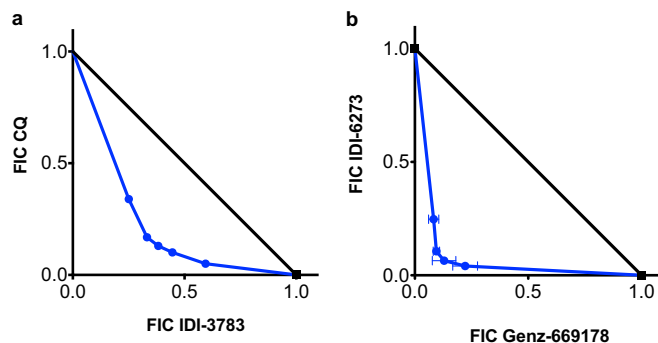

**Fig. S1.** (A) Synergy between paired inhibitors for both PfCRT and PfDHODH. CQ was tested in combination with IDI-3783 at multiple fixed volumetric ratios (10:0, 8:2, 6:4, 5:5, 4:6, 2:8, and 0:10). (B) Genz-669178 was tested in combination with IDI-6273 at multiple fixed volumetric ratios (15:0, 12:3, 9:6, 6:9, 3:12, and 0:15). Fractional inhibitory concentrations (FIC) for each drug were calculated and plotted. Synergy was defined as an FIC < 1.0, additivity as FIC = 1.0, and antagonism as FIC > 1.0 (1). Three biological replicates are shown.

1. Fivelman QL, Adagu IS, Warhurst DC (2004) Modified fixed-ratio isobologram method for studying in vitro interactions between atovaquone and proguanil or dihydroartemisinin against drug-resistant strains of *Plasmodium falciparum*. *Antimicrob Agents Chemother* 48(11):4097–4102.

**Table S1. EC<sub>50</sub> values for CQ<sup>S</sup>, CQ<sup>R</sup>, and Dd2:Q352R parasites**

| Compound    | Structure | SMILES                                                                      | EC <sub>50</sub> (nM) ± SD |                 |              |
|-------------|-----------|-----------------------------------------------------------------------------|----------------------------|-----------------|--------------|
|             |           |                                                                             | Dd2                        | 3D7             | Dd2: Q352R   |
| Chloroquine |           | <chem>CCN(CC)CCCC(C)NC1=C2C=CC(Cl)=CC2=NC=C1</chem>                         | 100 ± 10                   | 8.5 ± 1.3       | 14 ± 5.9     |
| IDI-3783    |           | <chem>CN1CCN(CC1)C(=O)C1=CC=C2SC3=CC=C(C=C3N2C1=O)C(F)=CC=C3Cl)C2=C1</chem> | 3.7 ± 0.45                 | 27,000 ± 15,000 | 4,400 ± 1900 |
| Atovaquone  |           | <chem>OC1=C(C2CCC(CC2)C2=CC=C(Cl)C=C2)C(=O)C(=O)C2=CC=CC=C12</chem>         | 0.12 ± 0.025               | 0.15 ± 0.0098   | 0.16 ± 0.068 |
| Mefloquine  |           | <chem>O[C@H]([C@H]1CCCCN1)C1=C2C=CC=C(C2=NC(=C1)C(F)(F)C(F)(F)F)</chem>     | 11 ± 0.82                  | 14 ± 2.3        | 10 ± 0.77    |

EC<sub>50</sub> values are mean ± SD of three biological replicates, each with triplicate measurements.

**Table S2. EC<sub>50</sub> values for 3D7, 3D7 E182D, and 3D7 E182D: D182E parasites**

| Compound            | Structure                                                                          | SMILES                                                                                          | EC <sub>50</sub> (nM) ± SD |              |                     |
|---------------------|------------------------------------------------------------------------------------|-------------------------------------------------------------------------------------------------|----------------------------|--------------|---------------------|
|                     |                                                                                    |                                                                                                 | 3D7                        | 3D7 E182D    | 3D7 E182D:<br>D182E |
| Genz-669178         | 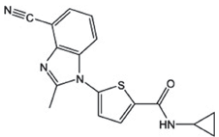  | <chem>CC1 = NC2 = C(C = CC = C2N1C1 = CC = C(S1)C(=O)NC1CC1)C#N</chem>                          | 13 ± 2.3                   | 73 ± 0.63    | 22 ± 2.9            |
| DSM74               |   | <chem>FC(F)(F)C1 = CC = C(NC2 = CC(C)=NC3 = NC = NN32)C = C1</chem>                             | 130 ± 25                   | 710 ± 130    | 190 ± 20            |
| IDI-6253            |   | <chem>CC1 = NN = C2C3 = C(C = CC = C3)C(N4CCC5 = C(C = CC = C5)C4)=NN21</chem>                  | 12,000 ± 1,400             | 11,000 ± 700 | 17,000 ± 2,000      |
| IDI-6273            |   | <chem>CCOC1 = CC = CC(=O)C2 = C(C)N(CC3 = CC = C(Cl)C = C3)C(C)=C12</chem>                      | 2,300 ± 202                | 210 ± 21     | 4,000 ± 410         |
| GSK-3               |   | <chem>CCSC1 = NN = C(N1CC)C2CCCC(N(C2)CC(NC3 = C(Cl)C = CC(C(F)(F)F)=C3)=O</chem>               | 320 ± 34                   | 1,800 ± 260  | 480 ± 47            |
| Dihydro-artemisinin |  | <chem>C[C@]1(O2)CC[C@@]3([H])[C@H](C)CC[C@@]4([H])[C@@H](C)[C@@H](O)[C@@]2([H])[C@]43OO1</chem> | 2.7 ± 0.079                | 1.8 ± 0.071  | 2.9 ± 1.1           |

EC<sub>50</sub> values are mean ± SD of three biological replicates, each with triplicate measurements. SMILES, simplified molecular-input line-entry system.

Table S3. EC<sub>50</sub> values for Dd2 parasites selected with a combination of PfDHODH inhibitors (Genz-669178 and IDI-6273)

| Compound            | Structure                                                                            | SMILES                                                                                          | Dd2         | Selection 1   | Selection 2 | Selection 3 | Selection 4   |
|---------------------|--------------------------------------------------------------------------------------|-------------------------------------------------------------------------------------------------|-------------|---------------|-------------|-------------|---------------|
| Genz-669178         | 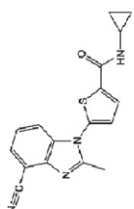  | <chem>CC1=NC2=C(C=C=CC=C2N1C1=CC=C(S1)C(=O)NC1CC1)C#N</chem>                                    | 3.5 ± 0.36  | 3.8 ± 1.8     | 3.6 ± 1.4   | 3.8 ± 0.65  | 3.4 ± 0.85    |
| DSM74               |   | <chem>FC1=CC=C(NC1=NC=NC2=NC=CC=C2)C=C(C(=O)NC3=NC=NN32)C=C1</chem>                             | 1,200 ± 150 | 1,700 ± 1,080 | 1,300 ± 510 | 1,100 ± 430 | 1,300 ± 4,500 |
| IDI-6253            |   | <chem>CC1=NN=C2C3=C(C=C=CC=C3)C(N4CC5=C(C=C=CC=C5)C4)=NN21</chem>                               | 70 ± 22     | 67 ± 15       | 59 ± 12     | 72 ± 26     | 73 ± 36       |
| IDI-6273            |   | <chem>CCOC1=CC=C(C=C1)C(=O)C2=C(C(=O)NC3=CC=C(Cl)C=C3)C(=O)C=C2</chem>                          | 54 ± 22     | 82 ± 43       | 79 ± 41     | 49 ± 13     | 52 ± 10       |
| GSK-3               |   | <chem>CCSC1=NN=C(N1CC)C2CCCN(C2)CC(NC3=CC=C(C(F)(F)F)=O)C(F)(F)F</chem>                         | 1,800 ± 240 | 1,900 ± 450   | 1,900 ± 290 | 1,900 ± 330 | 2,000 ± 380   |
| Dihydro-artemisinin |  | <chem>C[C@]1(O2)CC[C@@]3([H])[C@H](C)CC[C@@]4([H])[C@H](C)[C@H](O)O[C@@]2([H])[C@]143OO1</chem> | 3.8 ± 1.0   | 3.4 ± 0.43    | 3.1 ± 0.051 | 3.9 ± 1.9   | 4.3 ± 1.5     |

EC<sub>50</sub> values are mean ± SD of three biological replicates, each with triplicate measurements.

**Table S4. Purchased compound sources**

| Source        | Catalog     | SMILES                                                                                            | IDI number  |
|---------------|-------------|---------------------------------------------------------------------------------------------------|-------------|
| Sigma-Aldrich | C6628       | <chem>CCN(CC)CCCC(C)NC1 = C2C = CC(Cl)=CC2 = NC = C1</chem>                                       | Chloroquine |
| USP           | 1044651     | <chem>OC1 = C(C2CCC(CC2)C2 = CC = C(Cl)C = C2)C(=O)C(=O)C2 = CC = CC = C12</chem>                 | Atovaquone  |
| Sigma-Aldrich | M2319       | <chem>O[C@H]([C@H]1CCCCN1)C1 = C2C = CC = C(C2 = NC(=C1)C(F)(F)C(F)(F)F</chem>                    | Mefloquine  |
| ChemDiv       | C380-0605   | <chem>CN1CCN(CC1)C(=O)C1 = CC = C2SC3 = CC = CC = C3C(=O)N(CC3 = C(F)C = CC = C3Cl)C2 = C1</chem> | IDI-3783    |
| ChemDiv       | 4861-0080   | <chem>CCOC1 = CC = CC(=O)C2 = C(C)N(CC3 = CC = C(Cl)C = C3)C(C)=C12</chem>                        | IDI-6273    |
| Asinex        | ASN10333790 | <chem>CCSC1 = NN = C(C2CCCN(CC(=O)NC3 = CC(=CC = C3Cl)C(F)(F)C2)N1CC</chem>                       | GSK-756619  |
